# Supplementary material for: Endothelial Dysfunction Criteria in Critically Ill Children: The PODIUM Consensus Conference
Source: Oxford University Press journal article supplement (doi:10.1542/peds.2021-052888o), 2021-12-31
Supplement: peds_2021052888osupplementarydata.pdf [file peds_2021052888osupplementarydata.pdf]

**Endothelial Dysfunction Criteria in Critically Ill Children:  
The PODIUM Consensus Conference**

Richard W. Pierce MD, MS<sup>1</sup>, John S. Giuliano Jr MD, FCCM<sup>1</sup>, Jane E Whitney MD<sup>3</sup>, Yves Ouellette MD, PhD, FCCM<sup>4</sup>, on behalf of the  
Pediatric Organ Dysfunction Information Update Mandate (PODIUM) Collaborative

**Data Supplement**

**Table of Contents**

| <b>Content</b>                                                                                                                                                 | <b>Pages</b> |
|----------------------------------------------------------------------------------------------------------------------------------------------------------------|--------------|
| <b>Supplemental Figure 1.</b> Risk of Bias Assessment Summary for Studies Included in the PODIUM Endothelial Dysfunction Systematic Review (n=62 studies)      | 2            |
| <b>Supplemental Table 1.</b> Studies Included in the PODIUM Endothelial Dysfunction Systematic Review (n=62 studies)                                           | 3-9          |
| <b>Supplemental Table 2.</b> Performance Characteristics for Assessment Tools and Scores for Endothelial Dysfunction in Critically Ill Children (n=62 studies) | 10-18        |
| <b>References</b>                                                                                                                                              | 19-22        |

**Supplemental Figure 1.** Risk of Bias Assessment Summary for Studies Included in the PODIUM Endothelial Dysfunction Systematic Review (n=62 studies)

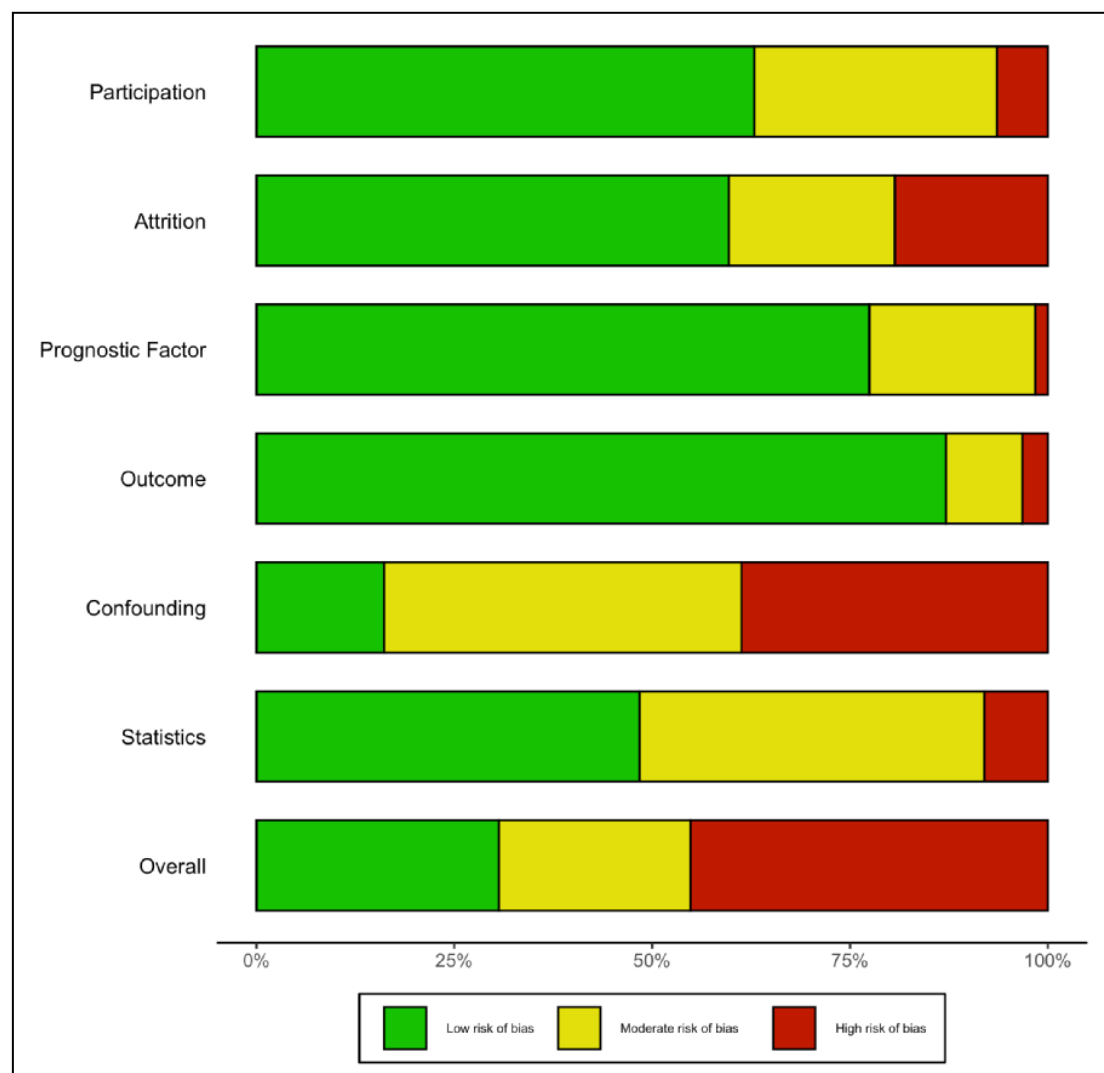

**Supplemental Table 1. Studies Included in the PODIUM Endothelial Dysfunction Systematic Review (n=62 studies)**

| Author (yr)                     | Funding                      | Study design                                            | Location         | No. of sites | Study years | Setting                                            | Data source(s)                              | Sample size | Recruitment            | Age categories <sup>a</sup>                    | Age details <sup>b</sup>                         |
|---------------------------------|------------------------------|---------------------------------------------------------|------------------|--------------|-------------|----------------------------------------------------|---------------------------------------------|-------------|------------------------|------------------------------------------------|--------------------------------------------------|
| Abo-Hagar (2017)                | Other (No financial support) | Prospective cohort                                      | Egypt            | 1            | 2014-2015   | PICU of unknown composition                        | Prospective data collection                 | 35          | NR/Unable to determine | Infants<br>Children<br>Adolescents             | Patients: 5.05 (3.51) and control 5.56 (3.79) yr |
| Al Yaman (1996)                 | Govt. NGO                    | Observational/descriptive study                         | Papua New Guinea | 1            | 1991-1994   | NR/Unable to determine                             | Prospective data collection                 | 92          | Convenience            | Children                                       | Mean 4.2 yr (2.1)                                |
| Al-Bitalgi (2017)               | Other (Self)                 | Prospective cohort                                      | Egypt            | 1            | 2012-2013   | PICU of unknown composition                        | Chart review<br>Prospective data collection | 40          | Convenience            | Infants<br>Children                            | Mean 23.7 (21.6) mo                              |
| Apltz (2012)                    | NR                           | Case series                                             | Germany          | 1            | NR          | Other (Catheterization lab)                        | Prospective data collection                 | 43          | NR/Unable to determine | NR/Unable to determine                         | Mean 10.4 (5.5) yr                               |
| Berger (2017)                   | Govt.                        | Prospective cohort, Retrospective cohort                | United States    | 4            | 2006-2011   | PICU (non-cardiac only)                            | Chart review<br>Prospective data collection | 99          | Convenience            | Neonates<br>Infants                            | Mean 4.7 (3.0) vs. 4.7 (3.1) mo                  |
| Berner (1998)                   | Govt. NGO                    | Retrospective cohort                                    | Germany          | 1            | 1993-1994   | Other (Children's Hospital Neonatal ICU admission) | Chart review                                | 136         | NR/Unable to determine | Neonates                                       | NR                                               |
| Conroy (2016)                   | Govt. NGO                    | Secondary analysis of RCTs, including subgroup analysis | Uganda           | 1            | NR          | Hospital floor outside the ICU                     | Prospective data collection                 | 180         | NR/Unable to determine | Children                                       | Median 2.0 [IQR 1.0-3.0] yr                      |
| Conroy (2012)                   | Govt.                        | Case/control study (case matched)                       | Malawi           | 1            | 1997-2009   | Hospital floor outside the ICU                     | Chart review<br>Prospective data collection | 155         | NR/Unable to determine | Infants<br>Children<br>Adolescents             | Median 34 [IQR 27-51] mo                         |
| DeMeloBezerra Cavalcante (2016) | Govt.                        | Prospective cohort                                      | Brazil           | 1            | 2013-2014   | PCICU (cardiac only)                               | Prospective data collection                 | 289         | Consecutive            | Neonates<br>Infants<br>Children<br>Adolescents | Mean 3.0 (4.4) yr                                |
| Eaton (2014)                    | NR                           | Retrospective cohort                                    | England          | 1            | 2002-2008   | Operating room (OR)                                | Registry                                    | 123         | NR/Unable to determine | Neonates                                       | Mean 39.3 weeks gestational age (0.6)            |
| Egerer (2000)                   | Govt.                        | Case series                                             | Germany          | 1            | NR          | NR/Unable to determine                             | Chart review<br>Prospective data collection | 119         | NR/Unable to determine | Children                                       | Median 42.5 mo [range 18-78]                     |

|                     |                                                |                                                     |                 |   |           |                                      |                                             |     |                        |                                                |                                                                                                                         |
|---------------------|------------------------------------------------|-----------------------------------------------------|-----------------|---|-----------|--------------------------------------|---------------------------------------------|-----|------------------------|------------------------------------------------|-------------------------------------------------------------------------------------------------------------------------|
| Emani (2013)        | NR                                             | Retrospective cohort                                | United States   | 1 | 2010-2012 | PCICU (cardiac only)                 | Chart review<br>Prospective data collection | 512 | Consecutive            | Neonates                                       | Thrombosis group<br>Mean 8 (1) days,<br>No thrombosis group Mean 7 (1) days                                             |
| Emani (2013)        | NR                                             | Prospective cohort                                  | United States   | 1 | NR        | PCICU (cardiac only)                 | Prospective data collection                 | 28  | NR/Unable to determine | Neonates                                       | Mean 3 (1) day                                                                                                          |
| Erdman (2011)       | Govt.<br>NGO<br>Other<br>(Charitable donation) | Retrospective cohort                                | Uganda          | 1 | 2007-2009 | NR/Unable to determine               | Chart review                                | 156 | Convenience            | Infants<br>Children                            | Overall NR                                                                                                              |
| Fattah (2017)       | Other (self)                                   | Prospective cohort, Cross-sectional study           | Saudi Arabia    | 1 | 2013-2015 | Other (NICU)                         | Chart review, Prospective data collection   | 320 | NR/Unable to determine | Neonates                                       | NR                                                                                                                      |
| Fijnvandraat (1995) | NR                                             | Prospective cohort                                  | The Netherlands | 1 | 1990-1992 | PICU of unknown composition          | Prospective data collection                 | 35  | Consecutive            | Infants<br>Children<br>Adolescents             | Median 4.3 y [range 0.13-15]                                                                                            |
| Flori (2007)        | Govt.<br>NGO                                   | Prospective cohort, Observation/descriptive study   | USA             | 2 | 1996-2000 | PICU of unknown composition          | Prospective data collection                 | 320 | NR/Unable to determine | Neonates<br>Infants<br>Children<br>Adolescents | Mean 5.9 yr (6)                                                                                                         |
| Flori (2003)        | Govt.                                          | Prospective cohort                                  | United States   | 2 | 1996-1998 | PICU of unknown composition          | Prospective data collection                 | 83  | Consecutive            | Neonates<br>Infants<br>Children<br>Adolescents | Mean 5.2 (5.5) yr                                                                                                       |
| Ganda (2018)        | NR                                             | Prospective cohort                                  | Indonesia       | 1 | 2017-2017 | Mixed PICU (cardiac and non-cardiac) | Prospective data collection                 | 70  | NR/Unable to determine | Infants<br>Children<br>Adolescents             | The mean age in improved group was 6.38 yr and median was 4.6 yr, while in dying group mean was 4.87 and median 2.30 yr |
| Giuliano (2013)     | Govt.                                          | Prospective cohort, Observational/descriptive study | USA             | 1 | 2009-2011 | PICU of unknown composition          | Prospective data collection                 | 45  | Consecutive            | NR/Unable to determine                         | Median non-SIRS 10.0y [IQR 2.8-15.0]; SIRS 9.5 y [IQR 5.5-14.0]; severe sepsis 13.0y [IQR 8.5-15.0]                     |
| Giuliano (2008)     | Govt.                                          | Prospective cohort                                  | USA             | 1 | NR        | PICU (cardiac only)                  | Chart review, Prospective data collection   | 48  | Consecutive            | Infants                                        | Median 5.1 [IQR 1.7-34.2] mo                                                                                            |

|                  |           |                                                               |                |   |           |                                |                                           |                                                                                     |                        |                                                |                                                                                                                                                |
|------------------|-----------|---------------------------------------------------------------|----------------|---|-----------|--------------------------------|-------------------------------------------|-------------------------------------------------------------------------------------|------------------------|------------------------------------------------|------------------------------------------------------------------------------------------------------------------------------------------------|
| Hamed (2019)     | NR        | Case/control study (case matched)                             | Egypt          | 1 | 2016-2017 | Other (NICU)                   | Chart review                              | 90                                                                                  | Convenience            | Neonates                                       | Neonatal                                                                                                                                       |
| Hassinger (2012) | NR        | Prospective cohort                                            | United States  | 1 | 2009-2010 | PCICU (cardiac only)           | Prospective data collection               | 100                                                                                 | Consecutive            | Neonates<br>Infants<br>Children<br>Adolescents | Elevated group median 4 [IQR 4-6.5] mo Normal group 61 [21-144] mo                                                                             |
| Iguchi (2010)    | NR        | Case/control study (case matched), Prospective cohort         | Japan          | 1 | 1996-2007 | NR/Unable to determine         | Chart review, Prospective data collection | 151 (12 with VOD)                                                                   | Consecutive            | Neonates<br>Infants<br>Children<br>Adolescents | Mean 7.8 yr [range 0-21] (SD not reported)                                                                                                     |
| Jain (2011)      | Govt. NGO | Case series                                                   | India          | 1 | 2004-2007 | Hospital floor outside ICU     | Chart review, Prospective data collection | 183                                                                                 | NR/Unable to determine | Children                                       | Healthy control median 25 [14-32], mild malaria 19 [12-36], cerebral malaria survivor 25 [12-40], cerebral malaria non-survivor 25 [13.5-37.5] |
| Kimura (2016)    | Govt.     | Randomized control trial (RCT), cross-over RTC, pragmatic RCT | USA            | 1 | NR        | PICU of unknown composition    | Prospective data collection               | 35                                                                                  | Random                 | Neonates<br>Infants<br>Children<br>Adolescents |                                                                                                                                                |
| Levy (2003)      | Govt. NGO | Prospective cohort                                            | France         | 2 | 1993-1999 | Other (Cardiac operating room) | Prospective data collection               | 17 Fontan patients, Good clinical outcome 8, Poor clinical outcome group 9 patients | Consecutive            | Children<br>Adolescents                        | Good outcome group median 10 [6-16] yr, poor outcome group median 3.5 [2-23] yr                                                                |
| Lin (2017)       | NGO       | Case/control study (case matched)                             | Taiwan         | 1 | 2012-2015 | PICU of unknown composition    | Prospective data collection               | 42 children with sepsis; 15 controls                                                | NR/Unable to determine | Children                                       | Median 4.1 yr [IQR 1.7-8.7]                                                                                                                    |
| Lo (2010)        | NR        | Prospective cohort, Observational/descriptive study           | United Kingdom | 1 | NR        | PICU of unknown composition    | Chart review, Prospective data collection | 28                                                                                  | Consecutive            | Infants<br>Children<br>Adolescents             | 8.59 yr [range 0.33-14.17]                                                                                                                     |
| Lo (2009)        | NR        | Prospective cohort, Observational/descriptive study           | United Kingdom | 1 | NR        | PICU of unknown composition    | Prospective data collection               | 28                                                                                  | Consecutive            | NR/Unable to determine                         | median favorable outcomes (n=24) 7.92 [range 0.33-14.17]; unfavorable outcomes (n=4)                                                           |

|                  |                    |                                                     |                     |   |           |                                             |                                           |                                                                                                                                                                                           |                        |                                       |                                                                                                                                                                                                                                        |
|------------------|--------------------|-----------------------------------------------------|---------------------|---|-----------|---------------------------------------------|-------------------------------------------|-------------------------------------------------------------------------------------------------------------------------------------------------------------------------------------------|------------------------|---------------------------------------|----------------------------------------------------------------------------------------------------------------------------------------------------------------------------------------------------------------------------------------|
|                  |                    |                                                     |                     |   |           |                                             |                                           |                                                                                                                                                                                           |                        |                                       | 10.50 [range, 2.33-13.42]                                                                                                                                                                                                              |
| Lopes (1998)     | NGO                | Prospective cohort                                  | Brasil              | 1 | 1993-1996 | Other (Heart Institute)                     | Prospective data collection               | 30                                                                                                                                                                                        | Consecutive            | Children Adolescents Adults           | Median 25 yr [range 1.2-45]                                                                                                                                                                                                            |
| Lovegrove (2009) | Govt. NGO          | Case/control study (case matched)                   | Thailand and Uganda | 2 | NR        | NR/Unable to determine                      | Registry                                  | 28 control, 67 uncomplicated malaria, 69 cerebral malaria                                                                                                                                 | NR/Unable to determine | Children Adolescents                  | Median controls 7 yr [3.2-12]; malaria 7 [3-12]; cerebral malaria 5.4 [3.2-12]                                                                                                                                                         |
| Mankhambo (2010) | NGO                | Prospective cohort, Observational/descriptive study | Malawi              | 1 | 2004-2006 | PICU of unknown composition                 | Chart review, Prospective data collection | 293                                                                                                                                                                                       | NR/Unable to determine | Infants Children Adolescents          | Median 2.4 yr [IQR 0.7-6.0]                                                                                                                                                                                                            |
| Manyelo (2019)   | Govt.              | Case series                                         | South Africa        | 1 | 2016-2017 | Hospital floor outside the ICU              | Prospective data collection               | 47                                                                                                                                                                                        | Consecutive            | Infants Children Adolescents          | Median 22 [IQR 10.5-57.0] mo                                                                                                                                                                                                           |
| Mariko (2019)    | Other (No funding) | Case series                                         | Indonesia           | 1 | NR        | Hospital floor outside the ICU              | Prospective data collection               | 110                                                                                                                                                                                       | Consecutive            | Children Adolescents                  |                                                                                                                                                                                                                                        |
| Meki (2003)      | NR                 | Prospective cohort, Observational/descriptive study | Egypt               | 1 | 2002-2002 | PICU of unknown composition                 | Prospective data collection               | 46                                                                                                                                                                                        | NR/Unable to determine | Children Adolescents                  | 2-13 yr                                                                                                                                                                                                                                |
| Melendez (2019)  | NR                 | Retrospective cohort                                | USA                 | 1 | 2012-2014 | Emergency room (ER)                         | Chart review                              | 94                                                                                                                                                                                        | NR/Unable to determine | Neonates Infants Children Adolescents | Sepsis 4.0 yr [IQR 1.8-11], septic shock 12.2 yr [IQR 8.1-16.3]                                                                                                                                                                        |
| Moxon (2015)     | NOG                | Prospective cohort                                  | Malawi              | 1 | 2008-2011 | Other (Hospital)                            | Prospective data collection               | 140 cerebral malaria with retinopathy, 36 cerebral malaria without retinopathy, 14 non-malaria comatose children, 91 mild malaria, 85 non-malaria febrile illness and 36 healthy controls | Consecutive            | Children                              | In mo: healthy controls 57 [39-94], Mild febrile illness 39 [24-62], uncomplicated malaria 65 [40-84], non-malaria coma 56 [31-64], retinopathy positive cerebral malaria 45 [28-52], retinopathy negative cerebral malaria 45 [33-62] |
| Murshid (2002)   | NR                 | Case series                                         | Saudi Arabia        | 1 | NR        | Other (ICU that treats children and adults) | Prospective data collection               | Exclude study: only 5 children and unable to extract pediatric data                                                                                                                       | NR/Unable to determine | Children Adolescents                  | Unable to determine                                                                                                                                                                                                                    |

|                          |              |                                                     |          |   |           |                             |                                           |                                                                                                                    |                        |                                    |                                                                                                                                                     |
|--------------------------|--------------|-----------------------------------------------------|----------|---|-----------|-----------------------------|-------------------------------------------|--------------------------------------------------------------------------------------------------------------------|------------------------|------------------------------------|-----------------------------------------------------------------------------------------------------------------------------------------------------|
| Osmancik (2001)          | Govt.        | Case/control study (case matched)                   | Germany  | 1 | 1995-1999 | PICU of unknown composition | Prospective data collection               | 50                                                                                                                 | NR/Unable to determine | Children                           | With bypass 7.7 (2.8) yr, without bypass 7.9 (3.2) yr                                                                                               |
| Padungmanee et al (2019) | NR           | Case series                                         | Thailand | 1 | 2016-2016 | PICU (non-cardiac only)     | Prospective data collection               | 103                                                                                                                | Consecutive            | Infants<br>Children<br>Adolescents | 3.8 yr (4.6)                                                                                                                                        |
| Peker (2011)             | Other (self) | Prospective cohort, Observational/descriptive study | Turkey   | 1 | NR        | Other (NICU)                | Prospective data collection               | 61                                                                                                                 | NR/Unable to determine | Neonates                           | Newborns                                                                                                                                            |
| Phiri (2011)             | NGO          | Prospective cohort                                  | Makawi   | 1 | NR        | NR/Unable to determine      | Prospective data collection               | 100 children with cerebral malaria, 59 with mild malaria, 32 with fever but no malaria, 20 health control children | Consecutive            | Infants<br>Children                | Cerebral malaria: 34.5 [8.0-86.0], mild malaria 24.0 [3.0-60.0], non-malaria febrile controls 23.5 [6.0-60.0], non-febrile controls 23.0 [6.0-48.0] |
| Qiu (2017)               | NR           | Case/control study (case matched)                   | China    | 1 | 2012-2015 | NR/Unable to determine      | Prospective data collection               | 32 controls, 31 hand foot mouth no encephalitis, 41 HFM encephalitis, 21 HFM severe encephalitis                   | NR/Unable to determine | Infants<br>Children                | Mean 2.15 yr (0.61)                                                                                                                                 |
| Samransamruajkit (2005)  | Govt.        | Case series, Observational/descriptive study        | Thailand | 1 | 2000-2002 | PICU of unknown composition | Chart review, Prospective data collection | 16                                                                                                                 | NR/Unable to determine | Infants<br>Children<br>Adolescents | Conventional vent. Mean 8.4 (SE 1.6) yr HFO Mean 2.48 (SE 0.7) yr                                                                                   |
| Sanli (2012)             | Industry     | Prospective cohort                                  | Turkey   | 1 | 2009-2009 | Other (Catheterization lab) | Prospective data collection               | 70                                                                                                                 | NR/Unable to determine | Infants<br>Children<br>Adolescents | Mo [range] 128.3 (87) [12 mo-26 yr] 104.2 (58) [2 mo-16 yr] 114.1 (53) [9 mo-16 yr]                                                                 |
| Shaikh (2015)            | Govt. NGO    | Prospective cohort                                  | Canada   | 1 | NR        | Other (Neonatal ICU)        | Prospective data collection               | 12 asphyxiated and 4 healthy control newborns                                                                      | Consecutive            | Neonates                           | Mean 39.4 (0.85) weeks GA for controls, 39.1 (1.9) weeks GA for cases                                                                               |
| Shi (1993)               | NR           | Case/control study (case matched)                   | China    | 1 | 1990-1993 | PICU of unknown composition | Prospective data collection               | 30 healthy controls, 14 sepsis, 6 septic shock                                                                     | NR/Unable to determine | Neonates                           | Median control 2.5 days [1-14], sepsis 3.5 days [1-27], shock 3 [1-7]                                                                               |
| Shiraishi (2008)         | NR           | Case series, Observational/                         | Japan    | 6 | 1998-2007 | NR/Unable to determine      | Prospective data collection               | 132 (6 HUS without encephalopathy, 10 HUS with, 10 acute                                                           | NR/Unable to determine | Infants                            | Median [range] HUS with 5.2y [17m-13y], HUS                                                                                                         |

|                   |       |                                                      |                |   |           |                                      |                             |                                                   |                        |                                                |                                                                                                                                                         |
|-------------------|-------|------------------------------------------------------|----------------|---|-----------|--------------------------------------|-----------------------------|---------------------------------------------------|------------------------|------------------------------------------------|---------------------------------------------------------------------------------------------------------------------------------------------------------|
|                   |       | descriptive study                                    |                |   |           |                                      |                             | colitis without HUS, 106 controls))               |                        |                                                | without 6.1y [18m-14y], acute colitis 6.3y [13m-12y], controls 6.4y [3m-15y]                                                                            |
| Sosa-Bust (2011)  | Govt. | Prospective cohort                                   | Mexico         | 1 | NR        | PICU of unknown composition          | Prospective data collection | 118                                               | Consecutive            | Infants<br>Children<br>Adolescents             | Sepsis (n=88) 3.5 mo [2.8-4.2]; controls (n=30) 2.9 mo [1.5-4.2]                                                                                        |
| Thampatty (2013)  | Govt. | Prospective cohort                                   | USA            | 1 | NR        | PICU (non-cardiac only)              | Prospective data collection | 19                                                | Consecutive            | Infants                                        | Mean 6.1 (3.7) mo and 6.5 (4.7) mo                                                                                                                      |
| Tzanetos (2012)   | Govt. | Case series                                          | USA            | 1 | NR        | PCICU (cardiac only)                 | Prospective data collection | 16                                                | Consecutive            | Neonates<br>Infants<br>Children<br>Adolescents | Norwood mean 4.6 days (1.7), Glenn 154.3 days (26.5), Fontan 864.3 days (213.4)                                                                         |
| Veleminsky (2008) | NR    | Case series                                          | Czech Republic | 1 | 2005-2006 | Other (delivery room)                | Prospective data collection | 152                                               | NR/Unable to determine | Neonates<br>NR/Unable to determine             | Newborn                                                                                                                                                 |
| Vieira (2010)     | Govt. | Prospective cohort                                   | Brazil         | 1 | 2004-2005 | PICU (non-cardiac only)              | Prospective data collection | 30                                                | Consecutive            | Neonates                                       | 27.7 days [IQR 12-50]                                                                                                                                   |
| Vitkova (2018)    | Govt. | Prospective cohort                                   | Czech Republic | 1 | 2017-2017 | Other (ECMO Center)                  | Prospective data collection | 26                                                | NR/Unable to determine | Neonates                                       | Newborns GA 38.9 (ECMO) to 39.4 (Control)                                                                                                               |
| Wang (2014)       | Govt. | Prospective cohort, Observational/ descriptive study | USA            | 1 | 2009-2011 | PICU of unknown composition          | Prospective data collection | 45                                                | Consecutive            | Infants<br>Children<br>Adolescents             | Median [IQR] non-SIRS 10.0y [2.8-15.0]; SIRS 9.5y [5.5-14.0]; severe sepsis 13.0y [8.5-15.0]                                                            |
| Whalen (2000)     | Govt. | Case/control study (case matched)                    | USA            | 1 | NR        | PICU (non-cardiac only)              | Prospective data collection | 77 sepsis/shock, 14 critically ill without sepsis | Consecutive            | Neonates<br>Infants<br>Children<br>Adolescents | Median 27 mo [1 day - 206 mo]                                                                                                                           |
| Wright (2018)     | Govt. | Case/control study (case matched)                    | Bangladesh     | 1 | 2013-2014 | Mixed PICU (cardiac and non-cardiac) | Prospective data collection | 420                                               | NR/Unable to determine | Neonates<br>Infants                            |                                                                                                                                                         |
| Yıldırım (2014)   | NR    | Prospective cohort, Observational/ descriptive study | Turkey         | 1 | 2008-2009 | PICU of unknown composition          | Prospective data collection | 42                                                | NR/Unable to determine | Infants<br>Children                            | L to R shunt no PAH 10.1 (1.1) [range 4-21] mo, L to R shunt with PAH 10.8 (5.4) [range 5-14] mo, L-R shunt with PAH and LCOS 6.8 (1.9) [range 4-11] mo |

|               |       |                                                      |               |   |           |                             |                             |                                            |                        |                                    |                          |
|---------------|-------|------------------------------------------------------|---------------|---|-----------|-----------------------------|-----------------------------|--------------------------------------------|------------------------|------------------------------------|--------------------------|
| Zaki (2009)   | NR    | Prospective cohort, Observational/ descriptive study | Egypt         | 1 | 2007-2007 | Other (NICU)                | Prospective data collection | 120                                        | Consecutive            | Neonates                           | Newborns                 |
| Zinter (2017) | Govt. | Prospective cohort                                   | United States | 5 | 2008-2015 | PICU (non-cardiac only)     | Prospective data collection | 194 total, 38 non-survivors, 156 survivors | Consecutive            | Infants<br>Children<br>Adolescents | 4.9 [0.9-11.5] yr        |
| Zinter (2016) | NR    | Case series                                          | USA           | 5 | 2008-2014 | PICU of unknown composition | Prospective data collection | 259                                        | NR/Unable to determine | Infants<br>Children<br>Adolescents | Median 5.2 yr [1.1-13.2] |

Abbreviations: Govt., government; NGO, nongovernmental organization; NR, not reported; PICU, pediatric intensive care unit; PCICU, pediatric cardiac intensive care unit; ; IQR, interquartile range; SD, standard deviation; mo, months; yr, years

<sup>a</sup>Neonates (0 to 30 days), Infants (31 days to < 1 year), Children (1 year to < 12 years), Adolescents (12 years to < 18 years)

<sup>b</sup>Data presented as mean (SD) or median [interquartile range, range]

**Supplemental Table 2. Performance Characteristics for Assessment Tools and Scores for Endothelial Dysfunction in Critically Ill Children (n=62 studies)**

| Author (yr)       | Score/Assessment Tool                                                           | Is this a study of score/tool derivation or validation?  | Inclusion criteria                                      | Timing of score/tool assessment         | Outcomes                                                                   | Performance Characteristics                                                                                                                                                                                                                                                                                                                                                                                                                                                |
|-------------------|---------------------------------------------------------------------------------|----------------------------------------------------------|---------------------------------------------------------|-----------------------------------------|----------------------------------------------------------------------------|----------------------------------------------------------------------------------------------------------------------------------------------------------------------------------------------------------------------------------------------------------------------------------------------------------------------------------------------------------------------------------------------------------------------------------------------------------------------------|
| Abo-Hagar (2017)  | Serum/plasma biomarkers, Other (CRP, SAA)                                       | Derivation                                               | General PICU population (mixed cardiac and non-cardiac) | 1 <sup>st</sup> and 3 <sup>rd</sup> day | Mortality, Other (Predicting VAP)                                          | Se: CRP 83.33 (35.9-99.6) mg/ml, SAA 100 (54.1-100)ug/ml, sICAM1 100 (54.1-100)ng/mL<br>Sp: CRP 72.41 (52.8-87.3) mg/ml, SAA 93.1 (77.2-99.2) ug/ml, sICAM1 179.31 (60.3-92) ng/mL<br>PPV: CRP 38.4 (13.0-69.6) mg/ml, SAA 74.9 (32.0-97.5) ug/ml, sICAM1 49.9 (19.9-80.0) ng/mL<br>NPV: CRP 95.5 (77.2-99.9) mg/ml, SAA 100 (87.2-100) ug/ml, sICAM1 100 (85.2-100) ng/mL<br>AUROC: CRP 0.83 (0.66-0.93) mg/ml, SAA 0.97 (0.86-1.00) ug/ml, sICAM1 0.95 (0.82-0.99) ng/mL |
| Al Yaman (1996)   | Other (Reactive Nitrogen Intermediates)                                         | NR                                                       | Other (cerebral malaria)                                | Serum at admission                      | Mortality, Other (Coma severity and duration)                              | Other: Kruskal-Wallis nonparametric test: Coma score (2-4/0-1) vs RNI levels, p=0.008; duration >48h, p=0.046; death, p=0.014                                                                                                                                                                                                                                                                                                                                              |
| Al-Bitalgi (2017) | Serum/plasma biomarkers                                                         | Validation                                               | General PICU population (mixed cardiac and non-cardiac) | Day 1 and day 3                         | Organ-specific outcomes/residual morbidity                                 | Se: Best cutoff value of plasma sICAM-1 level for prediction of death from ALI with the highest sensitivity (100%) specificity (83%) was 1000 ng/mL for sICAM-1 at day 3 with positive predictive value of 88%.<br>AUROC: Area under the curve (AUC) was larger for the sICAM-1 level at day 3 than at day 1.                                                                                                                                                              |
| Apltz (2012)      | Other (pulmonary endothelial function by vasodilator response to acetylcholine) | Validation                                               | Other (idiopathic pulmonary arterial hypertension)      | Day of procedure                        | Functional outcomes/residual morbidity                                     | AUROC: The ROC curve analysis also was performed for reduction of mPAP-to-mSAP ratio and revealed a reduction of mPAP-to-mSAP ratio of 30% as the best cutoff value (area under the ROC curve: 0.753, 95% confidence interval: 0.603 to 0.904, sensitivity: 0.63, specificity: 0.81, p = 0.006)                                                                                                                                                                            |
| Berger (2017)     | Serum/plasma biomarkers                                                         | Other (Retrospective derivation, prospective validation) | General PICU population (only non-cardiac)              | Not defined                             | Other (Set of biomarkers that predict presence of intracranial hemorrhage) | Se/Sp: Sensitivity and specificity for prediction of AHT was 95.8% (95% CI, 94.4-97.0) and 54.9% (95%CI, 50.9-58.9) at a cutoff of 0.182<br>AUROC: AUC s 0.906 (95% CI, 0.893-0.919).                                                                                                                                                                                                                                                                                      |
| Berner (1998)     | Serum/plasma biomarkers                                                         | NR                                                       | Sepsis                                                  | Cord blood at birth                     | Other (Unable to determine since the Tables and Figures did not copy well) | Se/Sp: Unable to read Table 3                                                                                                                                                                                                                                                                                                                                                                                                                                              |
| Conroy (2016)     | Serum/plasma biomarkers                                                         | Validation                                               | Other (Severe malaria)                                  | Day 1, 2, 3, 4, 14                      | Mortality, Functional outcomes/residual morbidity                          | AUROC: Models including Ang-2 or sFlt-1 were significantly better than LODS alone at predicting in-hospital mortality with AUCs of 0.85 (95% CI, .79-.90; P = .03) and 0.83 (95% CI, .77-.88, P = .03)                                                                                                                                                                                                                                                                     |
| Conroy (2012)     | Serum/plasma biomarkers                                                         | Validation                                               | Other (Cerebral malaria)                                | Day 1 of hospital admission             | Mortality                                                                  | Se: 93.2% sensitivity to predict death and a misclassification rate of 23.1%<br>AUROC: 0.73 (95% CI: 0.65-0.79).<br>aOR: 3.9 (1.2-12.7), p=0.024                                                                                                                                                                                                                                                                                                                           |

|                                |                         |                         |                                                                                                                                                                |                     |                                                                        |                                                                                                                                                                                                                                                                                                                                                                                                                                                                                                                                                                                                                                                                                                                                                                                                                                                                                               |
|--------------------------------|-------------------------|-------------------------|----------------------------------------------------------------------------------------------------------------------------------------------------------------|---------------------|------------------------------------------------------------------------|-----------------------------------------------------------------------------------------------------------------------------------------------------------------------------------------------------------------------------------------------------------------------------------------------------------------------------------------------------------------------------------------------------------------------------------------------------------------------------------------------------------------------------------------------------------------------------------------------------------------------------------------------------------------------------------------------------------------------------------------------------------------------------------------------------------------------------------------------------------------------------------------------|
| DeMeloBezerraCavalcante (2016) | Serum/plasma biomarkers | Other (Investigational) | PCICU population (only cardiac)                                                                                                                                | NR                  | Organ-specific outcomes/residual morbidity                             | AUROC: post-op syndecan-1 predicts AKI (AUC 0.77, 0.05); post-op e-selectin predicts AKI (AUC 0.51, 0.05) post-op icam-1 predicts AKI (AUC0.57, 0.05)                                                                                                                                                                                                                                                                                                                                                                                                                                                                                                                                                                                                                                                                                                                                         |
| Eaton (2014)                   | Serum/plasma biomarkers | NR                      | Other (Patients with surgical bowel sections with confirmed NEC)                                                                                               | Unable to determine | Mortality                                                              | NR                                                                                                                                                                                                                                                                                                                                                                                                                                                                                                                                                                                                                                                                                                                                                                                                                                                                                            |
| Egerer (2000)                  | Serum/plasma biomarkers | Derivation              | General PICU population (mixed cardiac and non-cardiac), Sepsis, Other (SLE and pSS, patients with sepsis, different infectious diseases and healthy controls) | Day 1 or 2          | Other patient-centered outcomes                                        | Other: nonparametric Kruskal (Wallis test to compare the levels of sCD14, sE-selectin and sICAM-1 between the patient groups investigated. P-values of <0.05 were considered to be statistically significant.                                                                                                                                                                                                                                                                                                                                                                                                                                                                                                                                                                                                                                                                                 |
| Emani (2013)                   | NR                      | Other (Investigational) | PCICU population (only cardiac)                                                                                                                                | NR                  | Other (Presence of absence of thrombosis)                              | Other: Correlation. Significantly elevated plasminogen activator inhibitor 1 (PAI-1) and thrombin-activatable fibrinolysis inhibitor (TAFI) in SVP neonates with thrombosis compared with without thrombosis (p ¼ 0.04 and p ¼ 0.03, respectively)                                                                                                                                                                                                                                                                                                                                                                                                                                                                                                                                                                                                                                            |
| Emani (2013)                   | Serum/plasma biomarkers | Validation              | PCICU population (only cardiac)                                                                                                                                | Preop               | Other (Thrombosis)                                                     | AUROC: Area under the curve for PAI-1 = 0.762 (95% CI: 0.525 to 0.989; p = 0.04), TAFI = 0.786 (95% CI: 0.570 to 0.990; p = 0.03), TGA = 0.786 (95% CI: 0.592 to 0.980; p = 0.02) and for all 3 biomarkers combined, area under the curve = 0.908 (95% CI: 0.789 to 0.999; p = 0.001).                                                                                                                                                                                                                                                                                                                                                                                                                                                                                                                                                                                                        |
| Erdman (2011)                  | Serum/plasma biomarkers | Derivation              | Sepsis                                                                                                                                                         | Admission           | Mortality, Other (Biomarker levels in uncomplicated vs severe malaria) | Se: Predicting mortality with severe malaria: Ang-2 >5.6 ng/mL 78.3% (56.3-87.1); sICAM-1 >645.3 ng/mL 87% (66.4-97.2); sFlt-1 >1066.3 pg/mL 82.6% (61.2-95); PCT >43.1 56.5% (34.5-76.8); IP-10 >831.2 pg/mL 82.6% (61.2-95); sTREM-1 >289.9pg/mL 95.7% (78.1-99.9)<br>Sp: Same cutoffs: Ang-2 78.8% (68.2-87.1); sICAM-1 75% (64.1-84); sFlt-1 57.5% (45.9-68.5); PCT 82.5% (72.4-90.1); IP-10 85% (75.3-92); sTREM-1 43.8% (32.7-55.3)<br>PPV: Ang-2 18.2% (5.8-38.7); sICAM-1 17.4% (5.9-35.9); sFlt-1 10.5% (3.4-23.1); PCT 16.3% (3.8-39.5); IP-10 25% (8.3-49.8); sTREM-1 9.3% (3.3-19.6)<br>NPV: Ang-2 98.4% (92.4-99.9); sICAM-1 99% (93.2-100); sFlt-1 98.2% (90.4-100); PCT 96.9% (90.5-99.5); IP-10 98.8% (93.4-100); sTREM-1 99.4% (90.5-100)<br>LR: Ang-2 3.7 (2.9-4.7); sICAM-1 3.5 (2.8-4.3); sFlt-1 1.9 (1.5-2.5); PCT 3.2 (2.2-4.7); IP-10 5.5 (4.5-6.8); sTREM-1 1.7 (1.3- |

|                     |                         |                         |                                                                 |                                                   |                                                                                      |                                                                                                                                                                                                                                                                                                                                                                                                                                                                                                                                                                                                                                                                                                                               |
|---------------------|-------------------------|-------------------------|-----------------------------------------------------------------|---------------------------------------------------|--------------------------------------------------------------------------------------|-------------------------------------------------------------------------------------------------------------------------------------------------------------------------------------------------------------------------------------------------------------------------------------------------------------------------------------------------------------------------------------------------------------------------------------------------------------------------------------------------------------------------------------------------------------------------------------------------------------------------------------------------------------------------------------------------------------------------------|
|                     |                         |                         |                                                                 |                                                   |                                                                                      | 2.2)/Negative likelihood ratio: Ang-2 0.3 (0.1-0.7); sICAM-1 0.2 (0.06-0.5); sFlt-1 0.3 (0.1-0.8); PCT 0.5 (0.3-1); IP-10 0.2 (0.07-0.6); sTREM-1 0.1 (0.01-0.7)<br>AUROC: Ang-2 0.83 (0.75-0.9); sICAM-1 0.84 (0.75-0.9); sFlt-1 0.75 (0.65-0.83); PCT 0.72 (0.62-0.8); IP-10 0.8 (0.71-0.87); sTREM-1 0.76 (0.66-0.84); Parasitemia 0.66 (0.56-0.75)                                                                                                                                                                                                                                                                                                                                                                        |
| Fattah (2017)       | Serum/plasma biomarkers | NR                      | Sepsis, Other (NICU admission)                                  | Day 1 of symptoms                                 | Other (not reported, results reported according to early or late sepsis vs. healthy) | Se: CRP 78%, IL6 83%, TNF 69%, E-selectin 73%, Procalcitonin 72%<br>Sp: CRP 70%, IL6 68%, TNF 70%, E-selectin 60%, Procalcitonin 70%<br>AUROC: CRP 0.85 (0.81-0.89), IL6 0.82 (0.76-0.87), TNF 0.82 (0.75-0.87), E-selectin 0.74 (0.68-0.79), Procalcitonin 0.81 (0.75-0.86)                                                                                                                                                                                                                                                                                                                                                                                                                                                  |
| Fijnvandraat (1995) | Serum/plasma biomarkers | NR                      | General PICU population (mixed cardiac and non-cardiac)         | Day 1                                             | Mortality                                                                            | Se: Protein C activity <10 100%; GMPS >12 78%<br>Sp: Protein C activity <10 84%; GMPS >12 88%<br>PPV: Protein C activity <10 60%; GMPS >12 70%<br>NPV: Protein C activity <10 100%; GMPS >12 92%<br>Other: Protein C activity <10 12.6 (1.9-181); GMPS >12 8.8 (2.2-117)                                                                                                                                                                                                                                                                                                                                                                                                                                                      |
| Flori (2007)        | Serum/plasma biomarkers | NR                      | General PICU population (only non-cardiac)                      | vWF-Ag levels on day 1 and 2 of acute lung injury | Mortality, Other (Ventilator-free days)                                              | aOR: vWF-Ag >450 day 1 of ALI and mortality 7.0 (0.99-49.3); >=2 organ dysfunction and mortality 14.2 (1.5-138.5)// vWF-Ag >450 11.2 (1.1-115); PRISM III 1.5 (1.1-1.9)                                                                                                                                                                                                                                                                                                                                                                                                                                                                                                                                                       |
| Flori (2003)        | Serum/plasma biomarkers | Other (Investigational) | Other (PICU of unknown composition)                             | Day 1 and 2                                       | Mortality, Organ-specific outcomes/residual morbidity                                | Other: Increased odds of dying: day 1: odds ratio [OR] 1.10, range 1.02-1.18, p .012; day 2: OR 1.18, range 1.05-1.32, p .004, for each 100-point increase in sICAM-1;                                                                                                                                                                                                                                                                                                                                                                                                                                                                                                                                                        |
| Ganda (2018)        | Serum/plasma biomarkers | Derivation              | General PICU population (mixed cardiac and non-cardiac), Sepsis | Serum sVCAM-1 on admission                        | Other (Development of sepsis)                                                        | Se: 100% for sVACM1 > 313 ng/mL<br>Sp: 100% for sVACM1 >318 to >311 ng/mL<br>PPV: 100% for sVACM1 >318 to >311 ng/mL<br>NPV: 100% for sVACM1 > 313 ng/mL<br>AUROC: 1.00 for sVACM1 >318 to >313 ng/mL                                                                                                                                                                                                                                                                                                                                                                                                                                                                                                                         |
| Giuliano (2013)     | Serum/plasma biomarkers | Validation              | General PICU population (only non-cardiac), Sepsis              | Days 1-7                                          | Outcomes related to MODS                                                             | Se: At the optimal cutoff for angpt-2 (3,955 pg/mL), there was a sensitivity of 76% for predicting more severe illness.<br>Sp: At the optimal cutoff for angpt-2 (3,955 pg/mL), there was a specificity of 74% for predicting more severe illness.<br>PPV: At the optimal cutoff for angpt-2 (3,955 pg/mL), there was a positive predictive value of 68% for predicting more severe illness.<br>NPV: At the optimal cutoff for angpt-2 (3,955 pg/mL), there was a negative predictive value of 81% for predicting more severe illness.<br>AUROC: The angpt-2 level alone on day 2 showed a significant AUC to distinguish between patients with severe sepsis/septic shock versus all others (AUC = 0.77 [95% CI, 0.61-0.93]) |

|                  |                                                                       |                         |                                                                            |                                                                                         |                                               |                                                                                                                                                                                                                                                                                                                                                                                                                                            |
|------------------|-----------------------------------------------------------------------|-------------------------|----------------------------------------------------------------------------|-----------------------------------------------------------------------------------------|-----------------------------------------------|--------------------------------------------------------------------------------------------------------------------------------------------------------------------------------------------------------------------------------------------------------------------------------------------------------------------------------------------------------------------------------------------------------------------------------------------|
| Giuliano (2008)  | Serum/plasma biomarkers                                               | Validation              | PCICU population (only cardiac)                                            | Hour 0 (after the termination of CPB), and at hours 6 and 24 following cessation of CPB | Other (Length of stay, outcome following CPB) | Other: Angpt-2 levels correlated significantly with cardiac intensive care unit (CICU) length of stay (LOS) and were an independent predictor for CICU LOS on subsequent multivariate analysis. Baseline angpt-2/-1 ratio (P = 0.004), 24 h post-CPB angpt-2/-1 ratio (P = 0.05), 24 h post-CPB angpt-2 (P = 0.006), and positive postoperative fluid balance (P\0.001) remained significant independent predictors of prolonged CICU LOS. |
| Hamed (2019)     | Serum/plasma biomarkers                                               | Derivation              | Sepsis                                                                     | 1                                                                                       | Organ-specific outcomes/residual morbidity    | Se: NO, MDA and TAO levels sensitivity (96.4%, 95%, and 98.8% respectively)<br>Sp: NO, MDA and TAO levels specificity (93%, 92% and 94% respectively)                                                                                                                                                                                                                                                                                      |
| Hassinger (2012) | Serum/plasma biomarkers                                               | Other (Investigational) | PCICU population (only cardiac)                                            | Preoperative and post-operative assessment of ADMA                                      | Organ-specific outcomes/residual morbidity    | Other: Correlation                                                                                                                                                                                                                                                                                                                                                                                                                         |
| Iguchi (2010)    | Serum/plasma biomarkers                                               | NR                      | Other (Unable to determine)                                                | Protein C level drawn day 0, 7, 14, 21, 28 post stem cell transplant                    | Other (Development of VOD)                    | Se: Protein C activity 34.5% was 100% sensitive<br>Sp: Protein C activity 34.5% was 83.3% specific<br>AUROC: Protein C activity 34.5% 0.939 (0.897-0.981)                                                                                                                                                                                                                                                                                  |
| Jain (2011)      | Serum/plasma biomarkers                                               | Validation              | Other (Cerebral malaria)                                                   | Day 1                                                                                   | Mortality                                     | AUROC: ANG-1 (AUC = 0.35), ANG-2 (AUC = 0.95) and ratio of ANG-2/ANG-1 (AUC = 0.90) were better markers to discriminate CMNS from MM cases.                                                                                                                                                                                                                                                                                                |
| Kimura (2016)    | Serum/plasma biomarkers                                               | Validation              | General PICU population (only non-cardiac), Other (ARDS)                   | Day 0, 7                                                                                | Other (Clinical outcome)                      | NR                                                                                                                                                                                                                                                                                                                                                                                                                                         |
| Levy (2003)      | Other (Histochemical analysis of eNOS protein in lung biopsy samples) | Other (Investigational) | Other (Fontan Patients undergoing takedown)                                | On takedown procedure                                                                   | Other patient-centered outcomes               | Other: Correlation to histochemical scores of eNOS protein level between groups                                                                                                                                                                                                                                                                                                                                                            |
| Lin (2017)       | Serum/plasma biomarkers                                               | NR                      | Sepsis                                                                     | PICU Admission                                                                          | Mortality, Outcomes related to MODS           | AUROC: Serum thrombomodulin level and 1) septic shock AUC 0.867, cut off 4.71 mU/ml; 2) DIC 0.881, 5.71 mU/ml; 3) MODS 0.740, 4.71 mU/ml; 4) Mortality 0.863, 5.95 mU/ml                                                                                                                                                                                                                                                                   |
| Lo (2010)        | Serum/plasma biomarkers                                               | Validation              | General PICU population (only non-cardiac), Other (traumatic brain injury) | Day 1                                                                                   | Functional outcomes /residual morbidity       | AUROC: L-selectin and IL-6 respectively having the highest and lowest AUC of 0.92 and 0.83                                                                                                                                                                                                                                                                                                                                                 |

|                  |                         |                         |                                                                                 |           |                                                |                                                                                                                                                                                                                                                                                                                                                                                                                                                                                                                                                                                                                                                                                   |
|------------------|-------------------------|-------------------------|---------------------------------------------------------------------------------|-----------|------------------------------------------------|-----------------------------------------------------------------------------------------------------------------------------------------------------------------------------------------------------------------------------------------------------------------------------------------------------------------------------------------------------------------------------------------------------------------------------------------------------------------------------------------------------------------------------------------------------------------------------------------------------------------------------------------------------------------------------------|
| Lo (2009)        | Serum/plasma biomarkers | Validation              | General PICU population (only non-cardiac), Other (traumatic brain injury)      | Day 1     | Functional outcomes /residual morbidity        | Se: L-selectin day 1 88%; IL-8 day 1 92%; NSE day 1 83%; S100B day 1 79%; IL-6 day 1 71%;<br>Sp: L-selectin day 1 75%; IL-8 day 1 75%; NSE day 1 75%; S100B day 1 75%; IL-6 day 1 75%<br>AUROC: L-selectin day 1 0.92; IL-8 day 1 0.88; NSE day 1 0.83; S100B day 1 0.83; IL-6 day 1 0.83<br>Other: multiple paired analysis performed as well. Two combinations using S100b as the "screening marker" and either L-selectin or IL-6 as the "varying marker" achieved an AUC of 0.98, and their specificity and sensitivity for unfavorable outcome prediction were 96% and 100%, respectively.                                                                                   |
| Lopes (1998)     | Serum/plasma biomarkers | Other (Investigational) | PCICU population (only cardiac)                                                 | NR        | Mortality                                      | Other: Correlation. Elevated levels of vWF:Ag activity in patient with pulmonary hypertension and short term survival in patients with pulmonary hypertension                                                                                                                                                                                                                                                                                                                                                                                                                                                                                                                     |
| Lovegrove (2009) | Serum/plasma biomarkers | NR                      | NR                                                                              | Admission | Mortality, Other (Cerebral malaria prediction) | Se: Ang-1 cutoff 15.05 ng/ml: 0.7 (0.58-0.79); ang-2 cutoff 0.39 ng/ml: 0.83 (0.72-0.9); ratio cutoff 0.052: 0.73 (0.61-0.82); TNF cutoff 81.1 pg/ml: 0.48 (0.36-0.61)<br>Sp: Same cutoffs: ang-1 0.75 (0.63-0.83); ang-2 0.6 (0.48-0.71); 0.7 (0.58-0.79); 0.62 (0.49-0.74)<br>LR: Positive LR: ang-1 2.7 (1.8-4.3); ang-2 2.1 (1.5-2.8); ratio 2.4 (1.6-3.6); TNF 1.3 (0.84-2)//Neg LR ang-1 0.4 (0.28-0.6); ang-2 0.29 (0.17-0.51); ratio 0.39 (0.26-0.59); TNF 0.82 (0.6-1.1)<br>AUROC: Malaria vs Cerebral malaria: ang-1 0.785 (0.709-0.861); ang-2 0.688 (0.595-0.780); ang-2/1 ratio 0.779 (0.702-0.856); TNF 0.557 (0.753-0.661)<br>aOR: Ang-1 0.899 ng/ml (0.864-0.934) |
| Mankhambo (2010) | Serum/plasma biomarkers | Validation              | Sepsis                                                                          | Day 1     | Mortality                                      | aOR: Association with mortality                                                                                                                                                                                                                                                                                                                                                                                                                                                                                                                                                                                                                                                   |
| Manyelo (2019)   | Serum/plasma biomarkers | Derivation              | Other (TB meningitis)                                                           | NR        | NR                                             | Se: adult 7-marker biosignature in which transthyretin was replaced by NCAM1 73.9%<br>Sp: adult 7-marker biosignature in which transthyretin was replaced by NCAM1 66.7%<br>AUROC: adult 7-marker biosignature in which transthyretin was replaced by NCAM1 0.80                                                                                                                                                                                                                                                                                                                                                                                                                  |
| Mariko (2019)    | Other (Angiopietin-2)   | Derivation              | Other (Dengue fever)                                                            | NR        | Organ-specific outcomes/residual morbidity     | Se: 56.40%<br>Sp: 58.30%<br>AUROC: 63.40%                                                                                                                                                                                                                                                                                                                                                                                                                                                                                                                                                                                                                                         |
| Meki (2003)      | Serum/plasma biomarkers | Validation              | General PICU population (only non-cardiac), Other (scorpion envenomed children) | Day 1     | Other (Dysregulation of apoptosis)             | NR                                                                                                                                                                                                                                                                                                                                                                                                                                                                                                                                                                                                                                                                                |
| Melendez (2019)  | Serum/plasma biomarkers | Derivation              | Sepsis                                                                          | 1         | Outcomes related to MODS                       | Other: P-value                                                                                                                                                                                                                                                                                                                                                                                                                                                                                                                                                                                                                                                                    |

|                         |                         |                         |                                                                       |                                                   |                                                          |                                                                                                                                                                                                                                                                                                                                                                                                                                                                                                                                                                                                                                                                                                                                                                                                                                          |
|-------------------------|-------------------------|-------------------------|-----------------------------------------------------------------------|---------------------------------------------------|----------------------------------------------------------|------------------------------------------------------------------------------------------------------------------------------------------------------------------------------------------------------------------------------------------------------------------------------------------------------------------------------------------------------------------------------------------------------------------------------------------------------------------------------------------------------------------------------------------------------------------------------------------------------------------------------------------------------------------------------------------------------------------------------------------------------------------------------------------------------------------------------------------|
| Moxon (2015)            | Serum/plasma biomarkers | Other (Investigational) | General PICU population (only non-cardiac)                            | Admission                                         | Mortality, Other (Presence of retinopathy)               | Other: Correlation, only soluble thrombomodulin was significantly increased in non-survivors                                                                                                                                                                                                                                                                                                                                                                                                                                                                                                                                                                                                                                                                                                                                             |
| Murshid (2002)          | NR                      | NR                      | NR                                                                    | NR                                                | NR                                                       | NR                                                                                                                                                                                                                                                                                                                                                                                                                                                                                                                                                                                                                                                                                                                                                                                                                                       |
| Osmancik (2001)         | Serum/plasma biomarkers | Other (descriptive)     | Other (cardiac surgery)                                               | Pre-op, OR, Post-op                               | Other (No specific outcome. Descriptive study)           | Other: Comparing levels between bypass vs. no bypass during cardiac surgery                                                                                                                                                                                                                                                                                                                                                                                                                                                                                                                                                                                                                                                                                                                                                              |
| Padungmaneesub (2019)   | Serum/plasma biomarkers | Derivation              | General PICU population (only non-cardiac)                            | 1                                                 | Outcomes related to MODS                                 | AUROC: Adding antithrombin to DIC score was better than the original score for predict mortality [area under curve (AUC) = 0.662 vs AUC = 0.65] and bleeding (AUC = 0.751 vs AUC = 0.732).                                                                                                                                                                                                                                                                                                                                                                                                                                                                                                                                                                                                                                               |
| Peker (2011)            | Serum/plasma biomarkers | Validation              | Sepsis, Other (NICU)                                                  | Day 1                                             | Functional outcomes/residual morbidity                   | Other: Comparing levels between patient populations                                                                                                                                                                                                                                                                                                                                                                                                                                                                                                                                                                                                                                                                                                                                                                                      |
| Phiri (2011)            | Serum/plasma biomarkers | Other (Investigational) | General PICU population (only non-cardiac)                            | Admission, 2 and 30 days                          | Mortality, Other (presence of retinopathy)               | Other: Correlation                                                                                                                                                                                                                                                                                                                                                                                                                                                                                                                                                                                                                                                                                                                                                                                                                       |
| Qiu (2017)              | Serum/plasma biomarkers | NR                      | NR                                                                    | Acute and recovery phase but this was not defined | Organ-specific outcomes, Other (predicting encephalitis) | Se: Predicting HFMD with encephalitis: serum/CSF neuron specific enolase cutoffs 16.3/20.1: 83.87/90.32%; serum/CSF VCAM-1 cutoffs 429.3/24.3: 75.81/80.65%; serum NSE+VCAM 12.3+498.4: 72.6%; CSF NSE+VCAM 25.2+27.5: 75.8%<br>Sp: Serum/CSF NSE 82.8/81.72%; serum/CSF VCAM 87.1/83.87%; serum NSE+VCAM 76.34%; CSF NSE+VCAM 75.27%<br>PPV: Serum/CSF NSW 79.03/85.5; serum/CSF VCAM 82.3/77.4; serum NSE+VCAM 71; CSF NSE+VCAM 74.2<br>NPV: Serum/CSF NSE 70.5/77.5; serum/CSF VCAM 75.6/68.9; serum NSE+VCAM 63.3; CSF NSE+VCAM 66<br>AUROC: Serum/CSF NSE 0.908(0.84-0.975)/0.958(0.92-0.997); serum/CSF VCAM 0.886(0.782-0.95)/0.897(0.829-0.965); serum NSE+VCAM 0.963(0.924-1); CSF NSE+VCAM 0.988(0.966-1)<br>Youden's index: Serum NSE > 16.3 µg/L, CSF NSE > 20.1 µg/L, serum VCAM-1 > 429.3 µg/L, and CSF VCAM-1 > 24.3 µg/L |
| Samransamruajkit (2005) | Serum/plasma biomarkers | Validation              | General PICU population (mixed cardiac and non-cardiac), Other (ARDS) | days 1, 3, 5 and 7 of ARDS                        | Mortality                                                | LR: 11.9, p < 0.001                                                                                                                                                                                                                                                                                                                                                                                                                                                                                                                                                                                                                                                                                                                                                                                                                      |

|                   |                                                                      |                         |                                                                         |                                                |                                                                                      |                                                                                                                                                                                                                                                                                                                                                                                                                                                                                                                                                                                                                                                                                                                                                                                                               |
|-------------------|----------------------------------------------------------------------|-------------------------|-------------------------------------------------------------------------|------------------------------------------------|--------------------------------------------------------------------------------------|---------------------------------------------------------------------------------------------------------------------------------------------------------------------------------------------------------------------------------------------------------------------------------------------------------------------------------------------------------------------------------------------------------------------------------------------------------------------------------------------------------------------------------------------------------------------------------------------------------------------------------------------------------------------------------------------------------------------------------------------------------------------------------------------------------------|
| Sanli (2012)      | Serum/plasma biomarkers                                              | Validation              | Other (Pulmonary hypertension associated with congenital heart disease) | Day 1                                          | Functional outcomes/residual morbidity                                               | Se: Pulmonary hypertension association homocysteine sensitivity of 83%; ADMA sensitivity of 70%; NO sensitivity of 50%<br>Sp: Pulmonary hypertension association homocysteine specificity of 50%; ADMA specificity of 50%; NO specificity of 65%<br>PPV: Pulmonary hypertension association homocysteine positive predictive value of 73%; ADMA positive predictive value of 72%; NO positive predictive value of 68%<br>NPV: Pulmonary hypertension association homocysteine negative predictive value was 69%; ADMA negative predictive value of 57%; NO negative predictive value of 46%.<br>AUROC: Pulmonary hypertension association homocysteine area under the ROC curve was 84.1 % (P = 0.001); ADMA area under the ROC curve was 63.4 % (P = 0.11); NO area under the ROC curve was 57 % (P = 0.406) |
| Shaikh (2015)     | Serum/plasma biomarkers                                              | Other (Investigational) | Other (Neonatal ICU)                                                    | Admission through 96 hours                     | Other (Correlation with brain injury assessed by MRI)                                | NR                                                                                                                                                                                                                                                                                                                                                                                                                                                                                                                                                                                                                                                                                                                                                                                                            |
| Shi (1993)        | Serum/plasma biomarkers                                              | NR                      | Sepsis, Other (PICU)                                                    | Sepsis median 2 days (1-10), shock 1 day (1-2) | Organ-specific outcomes/residual morbidity                                           | NR                                                                                                                                                                                                                                                                                                                                                                                                                                                                                                                                                                                                                                                                                                                                                                                                            |
| Shiraishi (2008)  | Serum/plasma biomarkers                                              | Other (descriptive)     | Other (HUS, colitis)                                                    | day 2.2 (1.0 (range: 1 to 4 days)              | Other (predicting neurological complications)                                        | Other: Comparing levels between patient populations                                                                                                                                                                                                                                                                                                                                                                                                                                                                                                                                                                                                                                                                                                                                                           |
| Sosa-Bust (2011)  | Serum/plasma biomarkers                                              | Validation              | General PICU population (only non-cardiac), Sepsis                      | Day 1, 3, 7                                    | Mortality                                                                            | Other: Logistic regression analysis: $\Delta$ ICAM-1 > 250 ng/mL from day 1 to 3: coefficient 0.22, p=0.01                                                                                                                                                                                                                                                                                                                                                                                                                                                                                                                                                                                                                                                                                                    |
| Thampatty (2013)  | Other (CSF sampling of non-specific endothelial biomarker byproduct) | Other (Investigational) | General PICU population (only non-cardiac)                              | Days 1, 2, and 3 of PICU admission             | Other (Increased ADMA in CSF of TBI patients, hypothermia decreased CSF ADMA levels) | NR                                                                                                                                                                                                                                                                                                                                                                                                                                                                                                                                                                                                                                                                                                                                                                                                            |
| Tzanetos (2012)   | Serum/plasma biomarkers                                              | NR                      | PCICU population (only cardiac)                                         | POD 1, 3, 5, 10, 20, 30, 40                    | Other (Development of thrombus)                                                      | NR                                                                                                                                                                                                                                                                                                                                                                                                                                                                                                                                                                                                                                                                                                                                                                                                            |
| Veleminsky (2008) | Serum/plasma biomarkers                                              | Validation              | Other (neonates preterm labor)                                          | Day 1 (birth)                                  | Other (Onset of neonatal sepsis)                                                     | Se: IL-6 0.800; TNF-alpha 0.364; IL-8 0.875 and sICAM-1 0.833 and 0.952<br>Sp: IL-6 0.972; TNF-alpha 0.943; IL-8 0.965; and sICAM-1 0.952                                                                                                                                                                                                                                                                                                                                                                                                                                                                                                                                                                                                                                                                     |
| Vieira (2010)     | Serum/plasma biomarkers                                              | Other (Investigational) | Other (Infants with RSV bronchiolitis)                                  | Admission                                      | Other (Clinical score, duration of oxygen therapy, duration of                       | Other: Correlation                                                                                                                                                                                                                                                                                                                                                                                                                                                                                                                                                                                                                                                                                                                                                                                            |

|                 |                         |            |                                                         |                           |                                            |                                                                                                                                                                                                                                                                                                                                                                                                                                                                                                                             |
|-----------------|-------------------------|------------|---------------------------------------------------------|---------------------------|--------------------------------------------|-----------------------------------------------------------------------------------------------------------------------------------------------------------------------------------------------------------------------------------------------------------------------------------------------------------------------------------------------------------------------------------------------------------------------------------------------------------------------------------------------------------------------------|
|                 |                         |            |                                                         |                           | mechanical ventilation)                    |                                                                                                                                                                                                                                                                                                                                                                                                                                                                                                                             |
| Vitkova (2018)  | Serum/plasma biomarkers | Derivation | Other (Infants on ECMO compared to healthy controls)    | First week of life        | NR                                         | Other: Increase in pro-inflammatory markers in ECMO group                                                                                                                                                                                                                                                                                                                                                                                                                                                                   |
| Wang (2014)     | Serum/plasma biomarkers | NR         | General PICU population (only non-cardiac), Sepsis      | NR                        | Functional outcomes/residual morbidity     | PPV: Ang-1 0.384; Ang-2 0.625; Ang-2/Ang-1 0.760; VEGF 0.424<br>NPV: Ang-1 0.566; Ang-2 0.690; Ang-2/Ang-1 0.675; VEGF 0.764<br>Other: Canonical Correlation Analysis with the Forward Selection and Random Forests methods identified a particular set of biomarkers that included Angiopoietin-1 (Ang-1), Angiopoietin-2 (Ang-2), and Bicarbonate (HCO <sub>3</sub> ) as having the strongest correlations with sepsis severity.                                                                                          |
| Whalen (2000)   | Serum/plasma biomarkers | NR         | General PICU population (only non-cardiac)              | Admission and day 3       | Mortality, Outcomes related to MODS        | NR                                                                                                                                                                                                                                                                                                                                                                                                                                                                                                                          |
| Wright (2018)   | Serum/plasma biomarkers | Derivation | General PICU population (mixed cardiac and non-cardiac) | NR                        | Mortality, Other (Development of sepsis)   | aOR: Median Angpt-2:1 ratio was 0.48 [IQR: 0.25, 0.87] among infants who died compared to 0.21 [IQR: 0.10, 0.31] among survivors (aOR 2.29, p = 0.016)                                                                                                                                                                                                                                                                                                                                                                      |
| Yıldırım (2014) | Serum/plasma biomarkers | Validation | PCICU population (only cardiac)                         | Preop, postop day 1 and 5 | Organ-specific outcomes/residual morbidity | Se: sICAM-0 concentration >359 ng/mL, there was a sensitivity of 90% and specificity of 95% for identification of LCOS in patients with L-R shunt and PAH<br>AUROC: AUC: 0.98, 95% CI: 0.95-1.02, p<0.01                                                                                                                                                                                                                                                                                                                    |
| Zaki (2009)     | Serum/plasma biomarkers | NR         | NR                                                      | NR                        | Functional outcomes/residual morbidity     | Se: Laboratory Markers in Early Diagnosis of Neonatal Sepsis C-reactive protein 86%; sE-selectin 59%; CRP+ sE-selectin 45%.<br>Sp: Laboratory Markers in Early Diagnosis of Neonatal Sepsis C-reactive protein 97%; sE-selectin 87%; CRP+ sE-selectin 100%<br>PPV: Laboratory Markers in Early Diagnosis of Neonatal Sepsis C-reactive protein 96%; sE-selectin 81%; CRP+ sE-selectin 100%.<br>NPV: Laboratory Markers in Early Diagnosis of Neonatal Sepsis C-reactive protein 88%; sE-selectin 69%; CRP+ sE-selectin 65%. |
| Zinter (2017)   | Serum/plasma biomarkers | Derivation | General PICU population (only non-cardiac)              | Days 1, 2, 3, 4, 5        | Mortality                                  | AUROC: AUROC for the model including the OI, interleukin (IL)-8, and tumor necrosis factor (TNF)-R2 (gray line) was of 0.77 (95% CI, 0.70-0.83). The AUROC for the expanded model including the OI, IL-6, IL-8, IL-10, TNF-R2, and hematopoietic cellular transplantation (HCT) history (black line) was of 0.79 (95% CI, 0.72-0.86)                                                                                                                                                                                        |

|               |                         |    |                                                    |              |           |                                                                                                                                                                                                                                                                             |
|---------------|-------------------------|----|----------------------------------------------------|--------------|-----------|-----------------------------------------------------------------------------------------------------------------------------------------------------------------------------------------------------------------------------------------------------------------------------|
|               |                         |    |                                                    |              |           | Other: Correlation of elevated levels of cytokines with death: IL-6 p=0.013, IL-8 p=0.001, IL-18 p=0.037, IL-10 p=0.045 and TNF-R2 p=0.045                                                                                                                                  |
| Zinter (2016) | Serum/plasma biomarkers | NR | General PICU population (only non-cardiac), Sepsis | Days 1 and 3 | Mortality | aOR: Odds of Mortality day 1 ang-2: 3.7(1.2-11.5); day 3 ang-2: 10.2 (2.2-46.5); rising Ang-2: 3.3 (1.2-9.2)//All cause PICU mortality ang-2 day 1 4.0(1.3-11.6), day 3 ang-2 13(2.8-60.9)//all cause hospital mortality day 1 ang-2 3(1.1-8.1), day 3 ang-2 10.9(2.5-47.5) |

Abbreviations: Se, sensitivity; Sp, specificity; PPV, positive predictive value; NPV, negative predictive value; LR, likelihood ratio; AUROC, area under the receiver operating characteristics curve; aOR, adjusted odds ratio; PICU, pediatric intensive care unit; PCICU, pediatric cardiac intensive care unit

## References

1. Abo-Hagar H, Abo-Elezz A, Mehrez M, Mabrouk MM, Elshora OA. Diagnostic Efficacy of Serum Amyloid A Protein and Soluble Intercellular Adhesion Molecule 1 in Pediatric Ventilator-Associated Pneumonia. *J Intensive Care Med*. 2017;885066617702598.
2. Al Yaman FM, Mokela D, Genton B, Rockett KA, Alpers MP, Clark IA. Association between serum levels of reactive nitrogen intermediates and coma in children with cerebral malaria in Papua New Guinea. *Trans R Soc Trop Med Hyg*. 1996;90(3):270-3.
3. Al-Biltagi M, Abo-Elezz A, Abu-Ela K, Suliman GA, Sultan TGH. The Prognostic Value of Soluble Intercellular Adhesion Molecule 1 Plasma Level in Children With Acute Lung Injury. *J Intensive Care Med*. 2017;32(5):320-5.
4. Apitz C, Zimmermann R, Kreuder J, Jux C, Latus H, Pons-Kuhnemann J, et al. Assessment of pulmonary endothelial function during invasive testing in children and adolescents with idiopathic pulmonary arterial hypertension. *J Am Coll Cardiol*. 2012;60(2):157-64.
5. Berger RP, Pak BJ, Kolesnikova MD, Fromkin J, Saladino R, Herman BE, et al. Derivation and Validation of a Serum Biomarker Panel to Identify Infants With Acute Intracranial Hemorrhage. *JAMA pediatrics*. 2017;171(6):e170429.
6. Berner R, Niemeyer CM, Leitis JU, Funke A, Schwab C, Rau U, et al. Plasma levels and gene expression of granulocyte colony-stimulating factor, tumor necrosis factor- $\alpha$ , interleukin (IL)-1 $\beta$ , IL-6, IL-8, and soluble intercellular adhesion molecule-1 in neonatal early onset sepsis. *Pediatr Res*. 1998;44(4):469-77.
7. Conroy AL, Glover SJ, Hawkes M, Erdman LK, Seydel KB, Taylor TE, et al. Angiopoietin-2 levels are associated with retinopathy and predict mortality in Malawian children with cerebral malaria: a retrospective case-control study\*. *Crit Care Med*. 2012;40(3):952-9.
8. Conroy AL, Hawkes M, McDonald CR, Kim H, Higgins SJ, Barker KR, et al. Host Biomarkers Are Associated With Response to Therapy and Long-Term Mortality in Pediatric Severe Malaria. *Open forum infectious diseases*. 2016;3(3):ofw134.
9. De Melo Bezerra Cavalcante, C. T., Castelo Branco KM, Pinto Júnior VC, Meneses GC, De Oliveira Neves, F. M., De Souza, N. M. G., et al. Syndecan-1 improves severe acute kidney injury prediction after pediatric cardiac surgery. *J Thorac Cardiovasc Surg*. 2016;152(1):178-86.
10. Eaton S, Sebire N, Thyoka M, Pierro A. Histologic and immunohistochemical features associated with outcome in neonatal necrotizing enterocolitis. *European journal of pediatric surgery : official journal of Austrian Association of Pediatric Surgery et al] = Zeitschrift fur Kinderchirurgie*. 2014;24(1):51-6.
11. Egerer K, Feist E, Rohr U, Pruss A, Burmester GR, Dorner T. Increased serum soluble CD14, ICAM-1 and E-selectin correlate with disease activity and prognosis in systemic lupus erythematosus. *Lupus*. 2000;9(8):614-21.
12. Emani S, Zurakowski D, Baird CW, Pigula FA, Trenor C, 3, Emani SM. Hypercoagulability markers predict thrombosis in single ventricle neonates undergoing cardiac surgery. *Ann Thorac Surg*. 2013;96(2):651-6.
13. Emani S, Zurakowski D, Baird CW, Pigula FA, Trenor C, 3, Emani SM. Hypercoagulability panel testing predicts thrombosis in neonates undergoing cardiac surgery. *Am J Hematol*. 2014;89(2):151-5.
14. Erdman LK, Dhabangi A, Musoke C, Conroy AL, Hawkes M, Higgins S, et al. Combinations of host biomarkers predict mortality among Ugandan children with severe malaria: a retrospective case-control study. *PloS one*. 2011;6(2):e17440.
15. Fattah MA, Omer AF, Asaif S, Manlulu R, Karar T, Ahmed A, et al. Utility of cytokine, adhesion molecule and acute phase proteins in early diagnosis of neonatal sepsis. *Journal of natural science, biology, and medicine*. 2017;8(1):32-9.
16. Fijnvandraat K, Derkx B, Peters M, Bijlmer R, Sturk A, Prins MH, et al. Coagulation activation and tissue necrosis in meningococcal septic shock: severely reduced protein C levels predict a high mortality. *Thromb Haemost*. 1995;73(1):15-20.

17. Flori HR, Ware LB, Glidden D, Matthay MA. Early elevation of plasma soluble intercellular adhesion molecule-1 in pediatric acute lung injury identifies patients at increased risk of death and prolonged mechanical ventilation. *Pediatric critical care medicine : a journal of the Society of Critical Care Medicine and the World Federation of Pediatric Intensive and Critical Care Societies*. 2003;4(3):315-21.
18. Flori HR, Ware LB, Milet M, Matthay MA. Early elevation of plasma von Willebrand factor antigen in pediatric acute lung injury is associated with an increased risk of death and prolonged mechanical ventilation. *Pediatric Critical Care Medicine*. 2007;8(2):96-101.
19. Ganda IJ, Ali I, Lawang SA, Daud D. The prognostic value of soluble vascular cell adhesion molecules-1 (sVCAM-1) in children with septic shock. *Current Pediatric Research*. 2018;22(2):131-6.
20. Giuliano JS, J., Lahni PM, Bigham MT, Manning PB, Nelson DP, Wong HR, et al. Plasma angiopoietin-2 levels increase in children following cardiopulmonary bypass. *Intensive Care Med*. 2008;34(10):1851-7.
21. Giuliano JS, J., Tran K, Li FY, Shabanova V, Tala JA, Bhandari V. The temporal kinetics of circulating angiopoietin levels in children with sepsis. *Pediatric critical care medicine : a journal of the Society of Critical Care Medicine and the World Federation of Pediatric Intensive and Critical Care Societies*. 2014;15(1):1.
22. Hamed AMM, Hassan AEA, Aladawy MAA, Hassan MH. Circulating nitric oxide, malondialdehyde and total antioxidant capacity levels among term septic neonates. *Current Pediatric Research*. 2019;23(2):106-11.
23. Hassinger AB, Wainwright MS, Lane JC, Haymond S, Backer CL, Wald E. Elevated preoperative serum asymmetrical dimethylarginine (ADMA) is associated with poor outcomes after pediatric cardiac surgery. *Intensive Care Med*. 2012;38(10):1697-704.
24. Iguchi A, Kobayashi R, Kaneda M, Kobayashi K. Plasma protein C is a useful clinical marker for hepatic veno-occlusive disease (VOD) in stem cell transplantation. *Pediatric blood & cancer*. 2010;54(3):437-43.
25. Jain V, Lucchi NW, Wilson NO, Blackstock AJ, Nagpal AC, Joel PK, et al. Plasma levels of angiopoietin-1 and -2 predict cerebral malaria outcome in Central India. *Malaria journal*. 2011;10:383.
26. Kimura D, Saravia J, Rovnaghi CR, Meduri GU, Schwingshackl A, Cormier SA, et al. Plasma Biomarker Analysis in Pediatric ARDS: Generating Future Framework from a Pilot Randomized Control Trial of Methylprednisolone: A Framework for Identifying Plasma Biomarkers Related to Clinical Outcomes in Pediatric ARDS. *Frontiers in pediatrics*. 2016;4:31.
27. Levy M, Danel C, Laval AM, Leca F, Vouhe PR, Israel-Biet D. Nitric oxide synthase expression by pulmonary arteries: a predictive marker of Fontan procedure outcome? *J Thorac Cardiovasc Surg*. 2003;125(5):1083-90.
28. Lin JJ, Hsiao HJ, Chan OW, Wang Y, Hsia SH, Chiu CH. Increased serum thrombomodulin level is associated with disease severity and mortality in pediatric sepsis. *PloS one*. 2017;12(8):e0182324.
29. Lo TYM, Jones PA, Minns RA. Pediatric brain trauma outcome prediction using paired serum levels of inflammatory mediators and brain-specific proteins. *J Neurotrauma*. 2009;26(9):1479-87.
30. Lo TYM, Jones PA, Minns RA. Combining coma score and serum biomarker levels to predict unfavorable outcome following childhood brain trauma. *J Neurotrauma*. 2010;27(12):2139-45.
31. Lopes AA, Maeda NY, Bydlowski SP. Abnormalities in circulating von Willebrand factor and survival in pulmonary hypertension. *Am J Med*. 1998;105(1):21-6.
32. Lovegrove FE, Tangpukdee N, Opoka RO, Lafferty EI, Rajwans N, Hawkes M, et al. Serum angiopoietin-1 and -2 levels discriminate cerebral malaria from uncomplicated malaria and predict clinical outcome in African children. *PloS one*. 2009;4(3):e4912.

33. Mankhambo LA, Banda DL, Jeffers G, White SA, Balmer P, Nkhoma S, et al. The role of angiogenic factors in predicting clinical outcome in severe bacterial infection in Malawian children. *Crit Care*. 2010;14(3):R91.
34. Manyelo CM, Solomons RS, Snyders CI, Mutavhatsindi H, Manngo PM, Stanley K, et al. Potential of host serum protein biomarkers in the diagnosis of tuberculous meningitis in children. *Frontiers in Pediatrics*. 2019;7.
35. Mariko R, Darwin E, Yanwirasti Y, Hadinegoro SR. The difference of angiopoietin-2 levels between dengue hemorrhagic fever patients with shock and without shock. *Open Access Macedonian Journal of Medical Sciences*. 2019;7(13):2119-22.
36. Meki AR, Hasan HA, El-Deen Z, Bakkar S. Dysregulation of apoptosis in scorpion envenomed children: its reflection on their outcome. *Toxicon : official journal of the International Society on Toxinology*. 2003;42(3):229-37.
37. Melendez E, Whitney JE, Norton JS, Silverman M, Harju-Baker S, Mikacenic C, et al. Systemic Angiopoietin-1/2 Dysregulation in Pediatric Sepsis and Septic Shock. *Int J Med Sci*. 2019;16(2):318-23.
38. Moxon CA, Chisala NV, Mzikamanda R, Maccormick I, Harding S, Downey C, et al. Laboratory evidence of disseminated intravascular coagulation is associated with a fatal outcome in children with cerebral malaria despite an absence of clinically evident thrombosis or bleeding. *Journal of Thrombosis and Haemostasis*. 2015;13(9):1653-64.
39. Murshid WR, Gader AG. The coagulopathy in acute head injury: comparison of cerebral versus peripheral measurements of haemostatic activation markers. *Br J Neurosurg*. 2002;16(4):362-9.
40. Osmancik P, Hambach J, Schneider P, Bellinghausen W, Tarnok A. Soluble endothelial adhesion molecules during paediatric cardiovascular surgery with or without cardiopulmonary bypass. *Cardiol Young*. 2002;12(2):130-7.
41. Padungmaneesub W, Reungrongrat S, Manowong S, Fanchaksai K, Panyasit N, Natesirinilkul R. Biomarkers of disseminated intravascular coagulation in pediatric intensive care unit in Thailand. *Int J Lab Hematol*. 2019;41(1):32-8.
42. Peker E, Akbayram S, Geylani H, Dogan M, Kirimi E. Global fibrinolytic capacity in neonatal sepsis. *Clinical and Applied Thrombosis/Hemostasis*. 2011;17(6):E64-9.
43. Phiri HT, Bridges DJ, Glover SJ, van Mourik JA, de Laat B, M'Baya B, et al. Elevated plasma von Willebrand factor and propeptide levels in Malawian children with malaria. *PLoS one*. 2011;6(11):e25626.
44. Qiu S, Jiang L, Jiang W, Wang J. Significance of NSE and VCAM-1 in children with hand foot mouth disease combined with encephalitis. *International Journal of Clinical and Experimental Medicine*. 2017;10(1):1108-14.
45. Samransamruajkit R, Prapphal N, Deelodegenavong J, Poovorawan Y. Plasma soluble intercellular adhesion molecule-1 (sICAM-1) in pediatric ARDS during high frequency oscillatory ventilation: a predictor of mortality. *Asian Pacific journal of allergy and immunology*. 2005;23(4):181-8.
46. Sanli C, Oguz D, Olgunturk R, Tunaoglu FS, Kula S, Pasaoglu H, et al. Elevated homocysteine and asymmetric dimethyl arginine levels in pulmonary hypertension associated with congenital heart disease. *Pediatr Cardiol*. 2012;33(8):1323-31.
47. Shaikh H, Boudes E, Khoja Z, Shevell M, Wintermark P. Angiogenesis dysregulation in term asphyxiated newborns treated with hypothermia. *PLoS ONE*. 2015;10(5).
48. Shi Y, Li HQ, Shen CK, Wang JH, Qin SW, Liu R, et al. Plasma nitric oxide levels in newborn infants with sepsis. *J Pediatr*. 1993;123(3):435-8.
49. Shiraishi M, Ichiyama T, Matsushige T, Iwaki T, Iyoda K, Fukuda K, et al. Soluble tumor necrosis factor receptor 1 and tissue inhibitor of metalloproteinase-1 in hemolytic uremic syndrome with encephalopathy. *J Neuroimmunol*. 2008;196(1-2):147-52.

50. Sosa-Bustamante G, Amador-Licona N, Barbosa-Sabanero G, Guizar-Mendoza J, Lopez-Briones S, Mulgado-Aguas C, et al. Intercellular adhesion molecules and mortality for sepsis in infants younger than 1 year of life. *Rev Invest Clin.* 2011;63(6):601-6.
51. Thampatty BP, Klamerus MM, Oberly PJ, Feldman KL, Bell MJ, Tyler-Kabara E, et al. Hypothermia decreases cerebrospinal fluid asymmetric dimethylarginine levels in children with traumatic brain injury. *Pediatric Critical Care Medicine.* 2013;14(4):403-12.
52. Tzanetos DRT, Yu C, Hernanz-Schulman M, Barr FE, Brown NJ. Prospective study of the incidence and predictors of thrombus in children undergoing palliative surgery for single ventricle physiology. *Intensive Care Med.* 2012;38(1):105-12.
53. Veleminsky M, J., Stransky P, Veleminsky M, S., Tosner J. Relationship of IL-6, IL-8, TNF and sICAM-1 levels to PROM, pPROM, and the risk of early-onset neonatal sepsis. *Neuro endocrinology letters.* 2008;29(3):303-11.
54. Vieira RA, Diniz EM, Ceccon ME. Correlation between inflammatory mediators in the nasopharyngeal secretion and in the serum of children with lower respiratory tract infection caused by respiratory syncytial virus and disease severity. *Jornal brasileiro de pneumologia : publicacao oficial da Sociedade Brasileira de Pneumologia e Tisiologia.* 2010;36(1):59-66.
55. Vitkova V, Panek M, Janec P, Sibikova M, Vobruha V, Haluzik M, et al. Endothelial Microvesicles and Soluble Markers of Endothelial Injury in Critically Ill Newborns. *Mediators Inflamm.* 2018;2018:1975056.
56. Wang K, Bhandari V, Giuliano JS, J., CS OH, Shattuck MD, Kirby M. Angiopoietin-1, angiopoietin-2 and bicarbonate as diagnostic biomarkers in children with severe sepsis. *PloS one.* 2014;9(9):e108461.
57. Whalen MJ, Doughty LA, Carlos TM, Wisniewski SR, Kochanek PM, Carcillo JA. Intercellular adhesion molecule-1 and vascular cell adhesion molecule-1 are increased in the plasma of children with sepsis-induced multiple organ failure. *Crit Care Med.* 2000;28(7):2600-7.
58. Wright JK, Hayford K, Tran V, Al Kibria GM, Baqui A, Manajjir A, et al. Biomarkers of endothelial dysfunction predict sepsis mortality in young infants: a matched case-control study. *BMC Pediatr.* 2018;18(1):118.
59. Yildirim A, Guzelmeric F, Oner CN, Karaagac AT, Sasmazel A, Erdem H, et al. Prognostic significance of sICAM-1 and sVCAM-1 molecules for cardiac surgery in pediatric patients with pulmonary hypertension. *Anadolu kardiyoloji dergisi : AKD = the Anatolian journal of cardiology.* 2014;14(3):274-9.
60. Zaki Mel S, el-Sayed H. Evaluation of microbiologic and hematologic parameters and E-selectin as early predictors for outcome of neonatal sepsis. *Arch Pathol Lab Med.* 2009;133(8):1291-6.
61. Zinter MS, Spicer A, Orwoll BO, Alkhoul M, Dvorak CC, Calfee CS, et al. Plasma angiopoietin-2 outperforms other markers of endothelial injury in prognosticating pediatric ARDS mortality. *American journal of physiology Lung cellular and molecular physiology.* 2016;310(3):224.
62. Zinter MS, Orwoll BE, Spicer AC, Alkhoul MF, Calfee CS, Matthay MA, et al. Incorporating Inflammation into Mortality Risk in Pediatric Acute Respiratory Distress Syndrome. *Crit Care Med.* 2017;45(5):858-66.
